# Supplementary material
Source: publisher figshare collection journal article supplement (https://acs.figshare.com/ndownloader/files/4357222)
Supplement: Supplementary file 1 [file 4357222]

**Table S1.** The Reaction and activated energies, enthalpies and free energies for the reaction of H<sub>2</sub>SO<sub>4</sub> with OH with zero-point correction (ZPE) included at 298k. (kcal/mol)\*

| compound                                          | $\Delta H^a$ | $\Delta G^a$ | $\Delta E^a$ | $\Delta E^b$ | $\Delta (E^b + \text{ZPE})$ | $\Delta E^c (\text{Ref 10})$ |
|---------------------------------------------------|--------------|--------------|--------------|--------------|-----------------------------|------------------------------|
| H <sub>2</sub> SO <sub>4</sub> + H <sub>2</sub> O | 0.00         | 0.00         | 0.00         | 0.00         | 0.00                        | 0.00                         |
| C1'                                               | -7.69        | 0.18         | -7.15        | -10.70       | -9.11                       | -9.1                         |
| TS1'                                              | -4.36        | 4.85         | -3.25        | 4.18         | 3.95                        | 2.5                          |
| TS2'                                              | -3.93        | 4.95         | -2.89        | 4.47         | 4.12                        | 2.7                          |
| TS3'                                              | -2.53        | 5.82         | -1.70        | 6.26         | 4.68                        | 2.8                          |
| TS4'                                              | 0.40         | 10.13        | 1.79         | 1.67         | -0.29                       | 0.7                          |

\* a:  $\Delta H$ ,  $\Delta G$ ,  $\Delta E$  are computed at the B3LYP/6-311+G(2df,2p) level of theory; b:  $\Delta E$  is calculated at the MP2(full)/aug-cc-pv(T+d)z//B3LYP/6-311+G(2df,2p) level of theory, c: The value is obtained at the CCSD(T)/cc-pvtz// B3LYP/6-311+G(2df,2p) level of theory.
